# 1 Task-dependent switching of 2 feedback controllers

3 Justinas Česonis<sup>1</sup> and David W. Franklin<sup>1,2,3,\*</sup>

\*For correspondence:  
[david.franklin@tum.de](mailto:david.franklin@tum.de)

4 <sup>1</sup>Neuromuscular Diagnostics, Department of Sport and Health Sciences, Technical  
5 University of Munich, Germany; <sup>2</sup>Munich Institute of Robotics and Machine Intelligence  
6 (MIRMI), Technical University of Munich, Germany; <sup>3</sup>Munich Data Science Institute (MDSI),  
7 Technical University of Munich, Munich, Germany

---

9 **Abstract** The separation of distinct motor memories by contextual cues is a well known and well  
10 studied phenomenon of feedforward human motor control. However, there is no clear evidence of  
11 such context-induced separation in feedback control. Here we test both experimentally and  
12 computationally if context-dependent switching of feedback controllers is possible in the human  
13 motor system. Specifically, we probe visuomotor feedback responses of our human participants in  
14 two different tasks – stop and hit – and under two different schedules. The first, blocked schedule,  
15 is used to measure the behaviour of stop and hit controllers in isolation, showing that it can only be  
16 described by two independent controllers with two different sets of control gains. The second,  
17 mixed schedule, is then used to compare how such behaviour evolves when participants regularly  
18 switch from one task to the other. Our results support our hypothesis that there is contextual  
19 switching of feedback controllers, further extending the accumulating evidence of shared features  
20 between feedforward and feedback control.

---

## 22 Introduction

23 Whether it is touching a hot surface, returning a tennis serve or simply lifting an object, the human  
24 body utilises a variety of sensory inputs to produce movements of any complexity. Indeed, differ-  
25 ent feedback modalities of human motor control, such as stretch reflex (*Houk (1976); Pruszynski*  
26 *and Scott (2012); Dimitriou (2016)*), vestibulo-ocular reflex (*Barr et al. (1976); Tabak and Collewyn*  
27 *(1994)*), visuomotor (*Prablanc and Martin (1992); Franklin and Wolpert (2008); Izawa and Shad-*  
28 *mehr (2008); Knill et al. (2011); Reynolds and Day (2012); Franklin et al. (2012); Pruszynski et al.*  
29 *(2018); Zhang et al. (2018); Saijo et al. (2005)*), or even auditory feedback (*Baram and Miller (2007);*  
30 *Oscari et al. (2012)*) have extensively been studied in prior literature. However, most studies have  
31 investigated feedback control in paradigms of either a single task (*Saunders and Knill (2003, 2005);*  
32 *Franklin et al. (2017); Oostwoud Wijdenes et al. (2011, 2013)*), or multiple tasks presented in their  
33 own dedicated blocks (*Day and Lyon (2000); Diedrichsen (2007); Maeda et al. (2018); Cross et al.*  
34 *(2019); Česonis and Franklin (2020)*). While such designs provide key insights into the behaviour of  
35 the feedback controller in isolation, they are not entirely reflective of human behaviour in real-life  
36 situations. For example, a realistic sequence of events could require a volleyball player to first  
37 pick up the ball from the ground by reaching for it with their hand and stopping on contact, only  
38 then to hit the same ball with the same hand a few moments later while serving. While studying  
39 both components independently has received focus in the field of motor control, any interactions  
40 between the feedback controllers in the context of rapid switching have not been broadly studied.

41 While feedback control in human movement is critical in correcting for random errors within  
42 movements, feedforward control corrects for movement errors that are predictable. In order

43 to systematically predict and compensate for specific errors upcoming in a given movement,  
44 the mechanism of contextual switching via contextual cues is broadly accepted. It is now well  
45 understood that performing two opposing tasks in an alternating manner will lead to interference  
46 (*Shadmehr et al. (1995)*; *Bock et al. (2001)*; *Sing and Smith (2010)*), resulting in behaviour that  
47 is averaged between the two tasks, failing to deal with either task. However, if the two tasks  
48 are performed in sufficiently different contexts, such as separate physical or visual workspaces  
49 (*Howard et al. (2013)*; *Forano and Franklin (2020)*; *Hirashima and Nozaki (2012)*), or different lead-  
50 in (*Howard et al. (2012)*; *Sarwary et al. (2015)*) or follow-through movements (*Howard et al. (2015)*;  
51 *Sheahan et al. (2016)*), this interference can be reduced, allowing the formation of two separate  
52 motor memories. While it is reasonable to expect similar contextual regulation of the feedback  
53 controllers, to our knowledge the regulation of feedback control in the paradigm of "multitasking"  
54 has not yet been tested. Therefore, in this study we test whether the feedback control policies  
55 exhibit such modulation when humans are presented with different tasks in an alternating manner.

56 One difference between studying contextual switching in feedforward and feedback control is  
57 that it is difficult to evaluate whether the feedback control policy has changed after the intervention.  
58 Specifically, it has been shown computationally that the optimal feedback controller (OFC) with  
59 fixed parameters can produce variable responses when correcting for perturbations within the  
60 movement, for example, when the comparable perturbations are induced in different parts (e.g.  
61 early or late) of otherwise identical movements (*Liu and Todorov (2007)*; *Česonis and Franklin (2020,*  
62 *2021)*; *Poscente et al. (2021)*). Furthermore, such behaviour was also observed in experimental  
63 studies (*Franklin and Wolpert (2008)*; *Oostwoud Wijdenes et al. (2011)*; *Dimitriou et al. (2013)*;  
64 *Franklin et al. (2016)*; *Česonis and Franklin (2020)*; *Poscente et al. (2021)*). Hence, merely observing  
65 a difference in the feedback response is not enough to conclude a change in the control policy.  
66 However, recently we demonstrated that as long as two perturbations of the same magnitude are  
67 induced at the same time-to-target, the same feedback control policy produces the same magnitude  
68 response, independent of whether the two perturbations occurred at the same location, time from  
69 the beginning of the movement, or the movement velocity (*Česonis and Franklin (2020)*). Thus, we  
70 can utilise this relationship between the magnitude (or intensity) of the feedback response to a  
71 perturbation at the same time-to-target to quantify whether the difference in the response is due  
72 to the change in the control policy or not.

73 In this study we test whether human participants exhibit similar switching between feedback  
74 control policies as they do for feedforward control. Specifically, we test how the feedback control  
75 policies are affected when our participants are presented with a "multitasking" scenario where they  
76 have to switch between performing two distinct tasks, i.e. reaching to and stopping at the target, or  
77 hitting through the target and stopping behind it. While the two tasks are fundamentally different,  
78 and in isolation should require different feedback control policies, here we test whether the same  
79 relationship holds true in the mixed schedule (as it would for contextual switching in feedforward  
80 control), or if the interference between two control policies results in a single policy, averaged or  
81 weighted between the two independent controllers.

## 82 Results

83 In this study we tested the behaviour of the human feedback controller when switching between  
84 two different tasks. Specifically, we presented our human participants with two tasks requiring  
85 different control policies – a stop task, where participants had to reach and stop at the target,  
86 and a hitting task, where participants had to punch through the target and stop behind it. In our  
87 previous work we demonstrated computationally that these two different types of movements  
88 trigger feedback responses of different magnitudes, even if the perturbations occur at the same  
89 position, time, or time-to-target (*Česonis and Franklin (2020)*). However, if the two movements  
90 share the same goal (for example the goal of stopping at the same target), then these feedback  
91 responses match in magnitude if the time-to-target matches in both movements, irrespective  
92 of other movement parameters like peak velocity, movement distance, distance to the target or

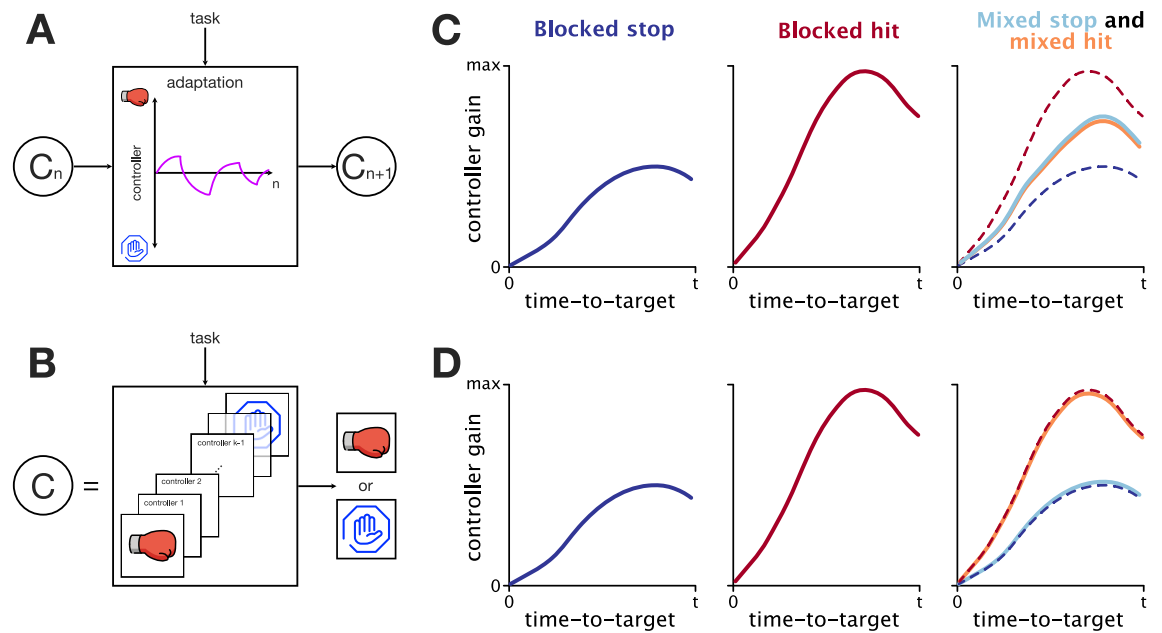

**Figure 1.** Theoretical predictions of two different architectures for feedback regulation. **A.** Universal feedback controller. A single feedback controller is used to produce both stop and hit movements, and is adapted to the given task over multiple trials. Such adaptive behaviour is reminiscent of the behaviour of the feedforward controller when learning two opposing force-fields without separable context.  $C_n$  indicates a feedback controller at trial  $n$ . **B.** A feedback controller as a set of task-specific controllers. A task-specific controller (stop or hit) is selected based on the task-related context and is used during the given movement. Such contextual switching behaviour is reminiscent of the behaviour of the feedforward controller when learning two opposing force fields with separable context. **C.** Expected regulation of feedback responses by the universal feedback controller. When exposed to a single task for a long time (blocked schedule) the controller adapts to the given task, producing optimal responses for both stop and hit conditions. However, due to interference within the mixed schedule, such a controller would settle to the average (or weighted average) gains between the two blocked conditions. **D.** Expected regulation of feedback responses by a set of task specific controllers. Within the blocked schedule, similar regulation is expected between hit and stop as in the case of the universal controller (**C**). However, in the mixed schedule, due to the task-related context, an appropriate controller is recalled on a trial-to-trial basis, producing similar regulation as within the blocked schedule.

93 current velocity. Therefore, such a relation between time-to-target and feedback response intensity  
 94 could be used to characterise the feedback control policy.

95 We use the relationship between the time-to-target and the feedback response intensity (which  
 96 serves as a proxy for feedback controller gain) as a means to analyse the controller behaviour  
 97 when the task changes. Specifically, we propose two alternatives for the architecture of such  
 98 control: a single universal feedback controller that exhibits adaptation to a given task (Figure 1A), or  
 99 multiple task-specific controllers, gated by task context (Figure 1B). When presented with a single  
 100 task in a blocked schedule (e.g. blocked stop or blocked hit), both the universal controller and  
 101 task specific controllers are expected to behave similarly, as the universal controller should easily  
 102 adapt its gains appropriately for the required task. However, if multiple tasks are presented in a  
 103 mixed schedule (i.e. task can randomly switch from trial to trial), the different control architectures  
 104 predict different responses. Particularly, a single universal controller would aim to adapt to each  
 105 presented task, thus on average producing responses somewhere in between the two given tasks  
 106 within the mixed schedule (Figure 1C). In contrast, a set of task-specific controllers would produce  
 107 similar responses in the mixed schedule as they would in a blocked schedule, as for every trial an  
 108 appropriate controller is selected from a set of controllers, rather than being adapted for the task  
 109 (Figure 1D).

110 In order to probe the control policies of human participants within these different tasks, we

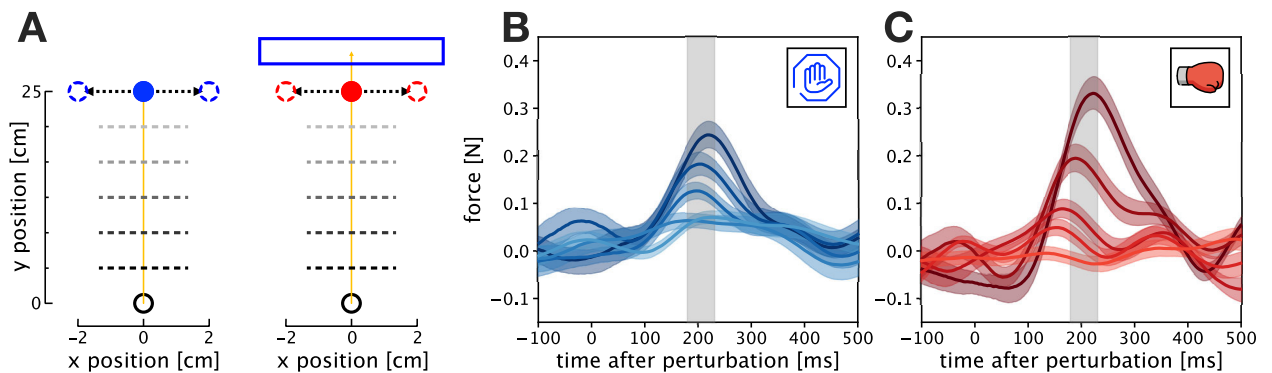

**Figure 2.** Experimental perturbations and responses. **A.** Perturbations in stop (left) and hit (right) conditions. Participants performed a forward reaching movement towards a target, positioned 25.0 cm in front of the start position. When the hand crossed one of five evenly spaced locations (dashed lines), a perturbation could be induced by shifting the target by 2 cm laterally for 250 ms and then returned back to the original position. Participants were instructed to either stop at the blue target (stop condition), or hit the red target and stop within the blue rectangle (hit condition). **B.** Net feedback responses to the target perturbations in the stop condition, measured via the force channel. Participants produced corrective responses to the target perturbations that varied by different perturbation onsets. Different traces represent different perturbation onsets, with darker colours indicating earlier perturbations. Shaded areas represent one standard error of the mean (SEM). The grey rectangle represents the time window of 180 – 230 ms, where the visuomotor feedback intensities are measured. **C.** Net feedback responses to the target perturbations in the hit condition.

111 occasionally perturbed participants during the movement by visually shifting the target perpen-  
112 dicular to movement direction and inducing a reactive visuomotor feedback response (Figure  
113 2A). Recently it has become common practice to maintain these perturbations until the end of  
114 the movement, such that an active correction is required to successfully complete the trial (*Re-*  
115 *ichenbach et al. (2013, 2014); Reichenbach and Diedrichsen (2015); Franklin et al. (2016); Gallivan*  
116 *et al. (2016); Franklin et al. (2017); de Brouwer et al. (2017, 2018); Ćesonis and Franklin (2020)*).  
117 However, we have noticed in our previous work that such maintained perturbations significantly  
118 impact the overall time-to-target, which in turn affects the visuomotor feedback gains (*Ćesonis and*  
119 *Franklin (2020)*). Thus, to keep the measurements of visuomotor feedback responses consistent  
120 within time-to-target, in this study we only perturbed our participants laterally in channel trials  
121 (*Franklin and Wolpert (2008); Dimitriou et al. (2013); Scheidt et al. (2000)*) and maintained these  
122 perturbations for 250 ms before switching them off, making any corrections redundant. As a  
123 result, even when producing the feedback response, participants' hands are constrained along the  
124 path of forward movement, resulting in matching movement durations independent of different  
125 perturbation onsets.

126 Participants produced involuntary feedback responses to the target jumps. These responses,  
127 observed as a lateral force exerted by the participants on the handle of the robotic manipulandum,  
128 were modulated by the different perturbation onsets (Figure 2BC). From these force responses we  
129 computed feedback intensities, by averaging individual responses over a time window 180 ms -  
130 230 ms relative to the perturbation onset on each individual trial. This time window has now been  
131 used in numerous studies to quantify such responses and is associated with the involuntary, early  
132 visuomotor responses (*Cross et al. (2019); Franklin and Wolpert (2008); Dimitriou et al. (2013);*  
133 *de Brouwer et al. (2017, 2018)*).

### 134 OFC model predicts differences between hit and stop conditions

135 We utilised the mixed-horizon OFC (*Ćesonis and Franklin (2021)*) model, presented in our earlier  
136 work, to generate predictions of feedback control policies in our current study. Due to the experi-  
137 mental design of this study not requiring an extension in movement times after perturbations, the  
138 predictions of the mixed-horizon model also matched the predictions of our earlier time-to-target

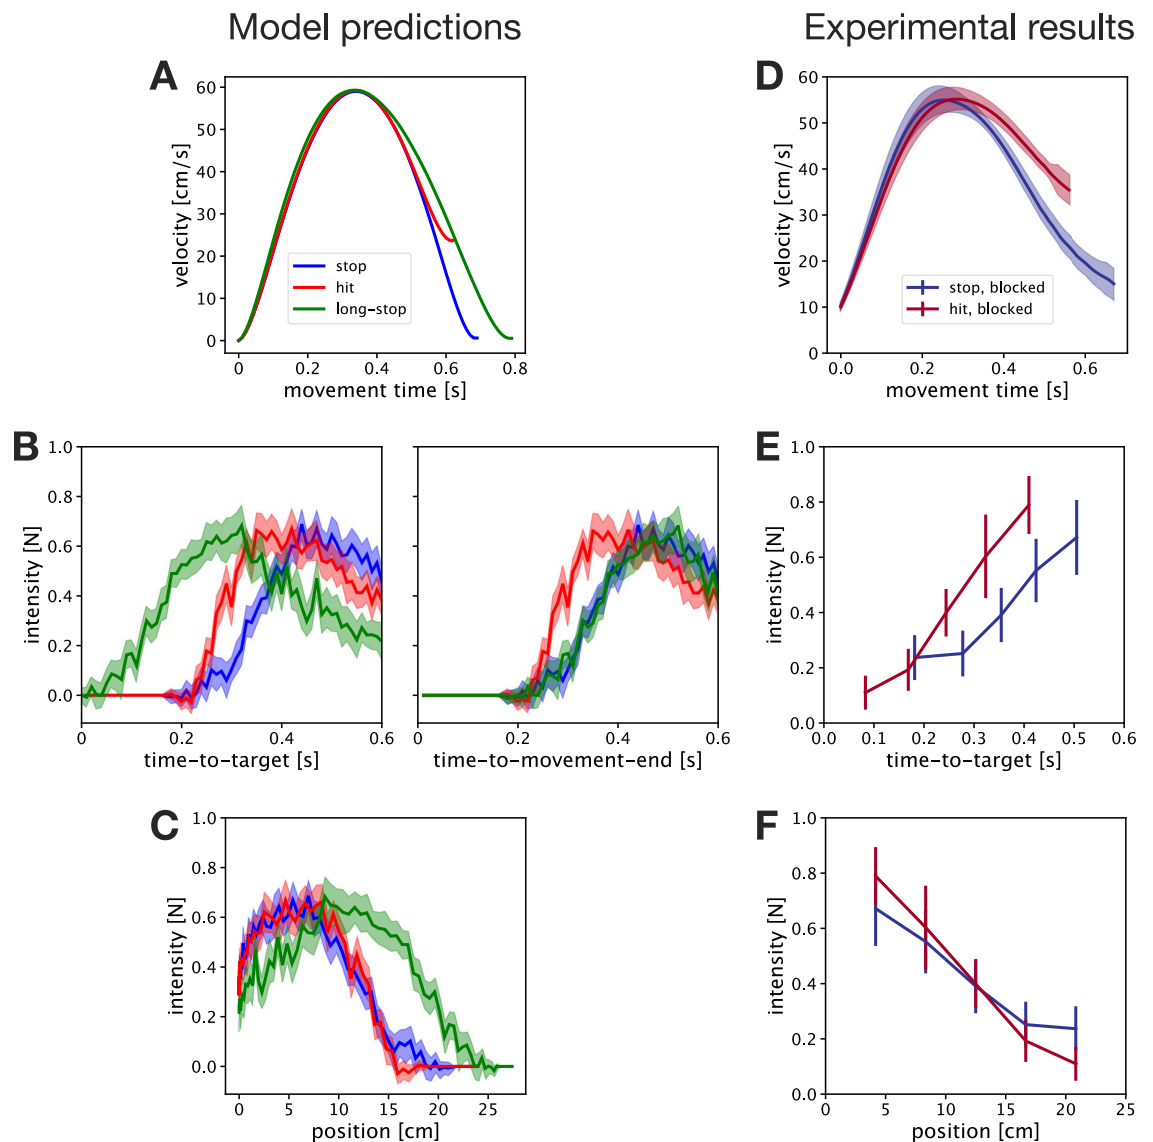

**Figure 3.** Comparison of OFC model predictions and experimental results. **A.** Simulated kinematics of stop, hit and long-stop conditions. Stop and hit conditions produce matching kinematics that only deviate shortly before movement end. The long-stop condition is a control simulation, that matched the kinematics of the hit condition for the duration of the hit movement, but was achieved with the same stop controller. **B.** Simulated feedback intensities as a function of time-to-target (left) and time-to-movement-end (right). Simulations predict a faster increase of response intensities for hit condition than for stop condition. As the long-stop condition is simulated via a longer (28 cm) movement, the time-to-target represents a time until the simulated movement crosses a point of 25 cm distance (the target distance). For hit and stop conditions, time-to-target and time-to-movement-end are identical. When expressed against time-to-movement-end, long-stop produces matching responses to the stop condition, as the feedback controller used for these movements is identical. With respect to the time-to-target, long-stop responses are time-shifted from the stop responses. **C.** Simulated feedback intensities as a function of the position. Stop and hit simulations with these particular kinematics produce matching feedback intensity profiles when expressed against position, even if the feedback controllers are different. In contrast, the long-stop simulation with a feedback controller matching that of the stop condition still produces different intensity profile against position. Shaded areas in simulated traces represent 95% confidence intervals for simulated results. **D.** Velocity profiles of participants in blocked stop and blocked hit conditions. The profiles match the task requirements. **E.** Feedback intensity profiles of participants in blocked stop and blocked hit conditions, expressed against time-to-target. Participants produce stronger responses at matching time-to-target in the hit condition, consistent with simulation results for hit and stop. **F.** Feedback intensity profiles of participants in blocked stop and blocked hit conditions, expressed against position. Participants produce matching responses within hit and stop conditions, supporting model simulations for stop and hit conditions, and not stop and long-stop. Error bars in experimental results represent 95% confidence intervals.



139 OFC model (*Česonis and Franklin (2020)*). In order to compare differences in control throughout  
140 hit and stop movements, we first simulated two movement conditions: a 25 cm long movement  
141 with 60 cm/s peak velocity and velocity at the target distance <1 cm/s (stop condition), and a similar  
142 movement, but with velocity at the target >20 cm/s (hit condition) (Figure 3A). Both models were  
143 implemented using a linear quadratic regulator (LQR), and were identical, apart from the difference  
144 in state-dependent costs of terminal velocity and terminal force. Here we reduced these cost  
145 parameters for the hit model by a factor of 50 in order to reduce the incentive to stop at the  
146 target, and thus successfully simulate hit-like movements. In addition, we also simulated a third  
147 condition, that we term the long-stop condition, where we used the same position, velocity, force  
148 and mean activation costs as in the stop model, but applied for reaching movements of 28 cm.  
149 The concept of the long-stop model is to compare the actual hit behaviour, executed through a  
150 different controller, with "cheating" behaviour where the same stop movement is performed to  
151 an imaginary target, located beyond the actual target, resulting in non-zero velocity at the actual  
152 target, and thus appearing as a hit movement. For all three conditions we then induced virtual  
153 target perturbations by shifting a target laterally by 2 cm at every time step from movement onset  
154 to movement end. With these simulations we obtained one continuous feedback response profile  
155 per condition, showing a dependency of feedback response intensity on time-to-target (Figure 3B).  
156 This feedback response profile is characteristic of the particular movement control policy associated  
157 with the movement goal, as it is maintained even if the kinematics of the movement change (Figure  
158 8 in *Česonis and Franklin (2020)*).

159 Even with similar simulated kinematics, that deviate from each other only in the last portion  
160 of the movement, the OFC model predicts striking differences in the control policies for stop and  
161 hit conditions (Figure 3B, blue and red traces) or hit and long-stop conditions (Figure 3B, red and  
162 green traces) when expressed against time-to-target. On the other hand, when expressed against  
163 position, even different controllers (hit vs stop) show no differences in feedback intensities, while  
164 identical control (stop vs long-stop) exhibit clear differences (Figure 3C). Among other things, these  
165 results point out limitations of position as a dependent variable in determining the changes of  
166 control policies, and provide yet additional support for time-to-target.

167 Our models make a few predictions for the behaviour of human participants. First, it challenges  
168 the classic assumption that visuomotor feedback response profiles are always bell shaped, if probed  
169 at evenly spaced locations or movement times. Instead, we propose that the bell-shaped feedback  
170 response profiles are consequential to the specific kinematic values imposed by the experiments,  
171 and other, for example monotonically decreasing intensity profiles, are also possible with faster  
172 movements (Figure 3C). Second, our simulations also make predictions on relative differences  
173 between the feedback intensity profiles in stop and hit conditions. Particularly, we expect the hit  
174 condition to produce stronger responses than the stop condition for short times-to-target, with  
175 this relationship inverting for long times-to-target if the two types of movements require different  
176 feedback controllers (Figure 3B). Note, that while in previous studies it is typical to compare such  
177 response profiles in terms of perturbation onset location, here no difference between hit and stop  
178 is predicted in position-dependent profiles (Figure 3C).

### 179 **Human control policies match model predictions in hit and stop conditions**

180 In order to compare the behaviour of our participants to the model predictions, we first analysed  
181 our results from the blocked schedule of the experiment. Here every participant has completed  
182 a block of 416 trials of hit condition and another block of 416 trials of stop condition, with the  
183 order counterbalanced across all participants. Our experimental results qualitatively match the  
184 predictions of our model. First, participants successfully differentiated between the kinematics of  
185 the hit and the stop condition, with both types of movements resulting in matching early and peak  
186 velocity, but with differences towards the end of the movement such that the velocity at the target  
187 is higher for the hit condition (Figure 3D). Specifically, in the hit condition participants produced  
188 movements with average velocity at the target of 38.5 cm/s, while successfully stopping at the target

189 in the stop condition. In addition, similar to the model simulations, movements in the hit condition  
190 were of slightly shorter duration (630 ms vs 700 ms).

191 Qualitatively, the experimental feedback responses also match the model predictions (Figure  
192 3EF). First, due to relatively fast reaching velocities in our experiment, as well as the lack of main-  
193 tained perturbations, all perturbations were induced at short times-to-target (under 550 ms). For  
194 comparison, in our previous study (*Česonis and Franklin (2020)*) perturbations were induced at  
195 times-to-target that ranged between 300 ms and 1000 ms, with peak feedback intensities recorded  
196 for perturbations with time-to-target at 400 ms. Second, both our data and the model produce  
197 feedback intensities at short times-to-target that are higher for the hit condition than for the stop  
198 condition, even in movement segments where the kinematics are otherwise similar. Importantly,  
199 we do not fit the model to match the data, but instead use it to qualitatively describe the relative  
200 regulation of stop and hit conditions. As such, matching features between the intensity profiles of  
201 the model (Figure 3BC) and the data (Figure 3EF) imply that similar computational mechanisms may  
202 be in action. Finally, our results also indicate that participants utilise different feedback controllers  
203 for the hit and stop conditions, as the experimental results for the blocked hit condition match the  
204 model simulations of the hit, rather than the long-stop condition.

### 205 **Human participants utilise contextual switching of feedback controllers**

206 In the previous sections we established the differences between the baseline control policies of  
207 hit and stop conditions. Here, we test how these policies change when the exposure to these  
208 conditions is no longer blocked. For example, it is natural in our daily activities to continuously  
209 switch between tasks, rather than doing a single task for many repetitions before switching to  
210 a new task. However, the question remains, how switching between different tasks affects the  
211 underlying feedback control policies. To test this, in the second half of the experiment we presented  
212 our participants with the same two types of movements (hit and stop), but now with the conditions  
213 randomly mixed across trials, instead of being presented in two separate blocks. As such, we could  
214 test for one of two possible outcomes:

- 215 1. Control policies for stop and hit movements in the mixed schedule match respectively the  
216 control policies in the stop and hit movements in the blocked schedule (Figure 1D). Such an  
217 outcome would indicate that participants are able to easily switch between different control  
218 policies (at least within consecutive trials).
- 219 2. Control policies for stop and hit movements in the mixed schedule do not match with the  
220 respective baseline policies, indicating interference when switching among multiple conditions  
221 (Figure 1C).

222 While both outcomes have previously been discussed from the sensorimotor adaptation perspective,  
223 to our knowledge they have not yet been demonstrated for feedback control.

224 Our participants successfully produced the movements required in the experiment (Figure  
225 4A). Particularly, we observed clear distinctions in the terminal velocity between the hit and stop  
226 conditions, independent of the experimental schedule (blocked or mixed). A two-way repeated-  
227 measures ANOVA showed a significant main effect on condition (hit or stop,  $F_{1,13} = 544.2$ ,  $p \ll 0.001$ ),  
228 but no significant main effect on experiment schedule (blocked or mixed,  $F_{1,13} = 0.710$ ,  $p = 0.42$ )  
229 or schedule/condition interactions ( $F_{1,13} = 0.681$ ,  $p = 0.42$ ). In addition, a complementary Bayesian  
230 repeated-measures ANOVA analysis showed similar results, with a very strong effect (*Raftery and*  
231 *Kass (1995)*) of condition (hit or stop,  $BF_{incl} = 1.6 \times 10^{25}$ ), and with a tendency towards no effect  
232 of schedule (blocked or mixed,  $BF_{incl} = 0.379$ ), or condition/schedule interaction ( $BF_{incl} = 0.409$ ).  
233 A similar analysis for peak velocities showed a significant main effect of condition (hit or stop,  
234  $F_{1,13} = 5.94$ ,  $p = 0.03$ ; although  $BF_{incl} = 1.12$  indicates not enough evidence to either reject or accept  
235 the null hypothesis) and condition/schedule interaction ( $F_{1,13} = 19.3$ ,  $p \ll 0.001$ ;  $BF_{incl} = 32.6$ ), but not  
236 on schedule (blocked or mixed,  $F_{1,13} = 1.52$ ,  $p = 0.24$ ;  $BF_{incl} = 0.56$  shows a weak tendency towards  
237 accepting null hypothesis). The Holm-Bonferroni corrected post-hoc analysis for the interaction

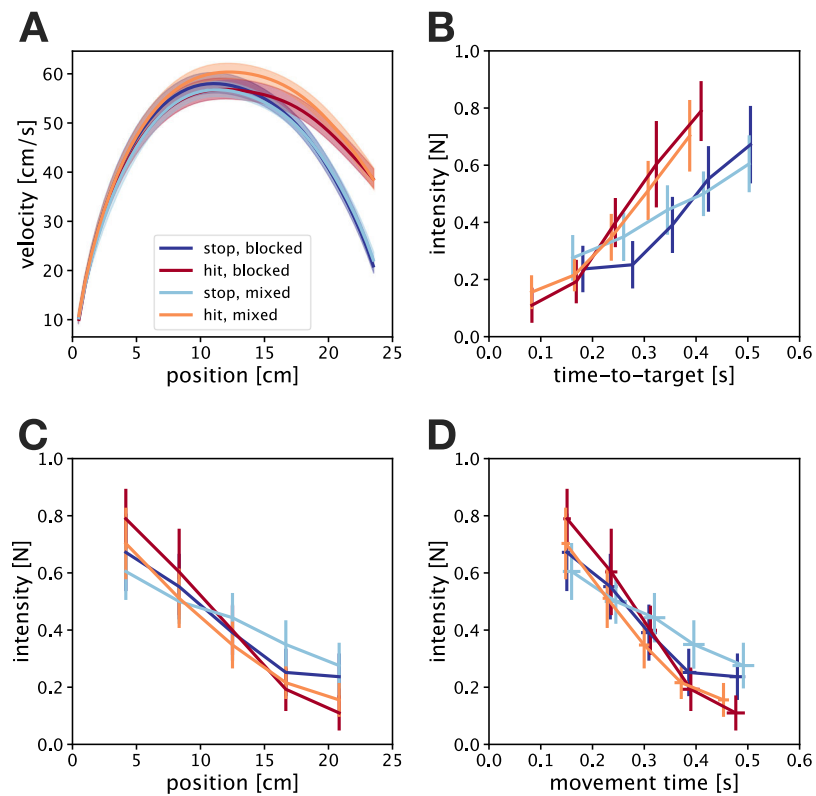

**Figure 4.** Experimental results of stop and hit conditions in both blocked and mixed schedules. **A.** Velocity profiles against position. Both stop conditions and both hit conditions produce respectively similar velocity profiles, showing that participants successfully performed the task in the mixed schedule. **B.** Feedback response intensities represented as a function of time-to-target. Hit and stop movements in the mixed schedule demonstrate differences when expressed against time-to-target, that match the differences between hit and stop conditions in the blocked schedule. This supports the hypothesis of contextual controller switching between multiple task-specific controllers. **C.** Feedback intensities in all four conditions show no differences when expressed against position or **D.** movement time at perturbation onset, as predicted by the OFC simulations. This questions the appropriateness of position or movement time as the reference frames in which to compare multiple feedback controllers. Error bars and shaded areas indicate 95% confidence intervals of the mean.

238 term revealed that participants produced slightly faster movements in the mixed-hit condition, with  
 239 the peak velocities matching otherwise.

240 We examined the evolution of the experimental visuomotor responses as a function of perturba-  
 241 tion onset position or onset time across the four different conditions (Figure 4CD). When expressed  
 242 against either position or time, the visuomotor intensity profiles do not show the classical bell-  
 243 shaped profile where strongest responses occur in the middle of the movement and are reduced  
 244 towards the beginning and end. Instead, our participants produced the strongest responses for  
 245 the earliest perturbations, induced at 1/6 of the total forward movement, with further responses  
 246 decaying in intensity as perturbations occurred closer to the target. Moreover, we observed no  
 247 significant differences in visuomotor responses across the different conditions and schedules.  
 248 Three-way repeated-measures ANOVA with condition (stop or hit), schedule (blocked or mixed)  
 249 and perturbation location (5 levels) as main factors showed no effect of condition ( $F_{1,13} = 0.486$ ,  
 250  $p = 0.50$ ;  $BF_{incl} = 0.238$  shows substantial evidence towards no effect), schedule ( $F_{1,13} = 0.096$ ,  
 251  $p = 0.76$ ;  $BF_{incl} = 0.142$  shows substantial evidence towards no effect) or condition/schedule inter-  
 252 action ( $F_{1,13} = 0.657$ ,  $p = 0.43$ ;  $BF_{incl} = 0.305$  shows substantial evidence towards no effect). While  
 253 we observed a significant main effect of the perturbation location ( $F_{2,9,37.7} = 61.2$ ,  $p \ll 0.001$  after  
 254 Greenhouse-Geisser sphericity correction;  $BF_{incl} = 9.3 \times 10^{36}$ ), such an effect was expected due



255 to the temporal evolution of feedback responses. In addition, we observed a significant inter-  
256 action between perturbation onset location and the condition ( $F_{2,1,27.0} = 6.26$ ,  $p = 0.005$  after the  
257 sphericity correction;  $BF_{incl} = 6.86$ ), however a Holm-Bonferroni corrected post-hoc analysis on the  
258 interaction term did not indicate any meaningful interaction effects, with none of the significant  
259 interactions appearing at the same perturbation onset location. Finally, the remaining interactions  
260 of schedule/perturbation ( $F_{2,6,33.9} = 2.67$ ,  $p = 0.07$  after Greenhouse-Geisser sphericity correction;  
261  $BF_{incl} = 0.289$ ) and condition/schedule/perturbation ( $F_{2,8,36.8} = 0.233$ ,  $p = 0.86$  after Greenhouse-  
262 Geisser sphericity correction;  $BF_{incl} = 0.075$ ) showed no significant effects. Thus, as a whole our  
263 analysis indicates that the feedback controllers could not be differentiated when expressed as a  
264 function of the position within the movement.

265 When expressed against time-to-target, the visuomotor feedback responses show decreasing  
266 feedback intensities with decreasing time-to-target, with responses virtually vanishing when the  
267 time-to-target approaches zero (Figure 4B). This behaviour is consistent with our previous models  
268 describing the time-gain relationship (*Česonis and Franklin (2020)*). In addition, we observe stronger  
269 increases in visuomotor feedback intensity with increasing time-to-target for the hit condition  
270 compared to the stop condition, in both blocked and mixed schedules. Such regulation was  
271 previously predicted by our time-to-target OFC model (see Fig 9C in *Česonis and Franklin (2020)*) for  
272 short times-to-target. Finally, we also observe a qualitative match between the two stop conditions  
273 (mixed and blocked) as well as between the two hit conditions (mixed and blocked), suggesting first  
274 evidence of rapid feedback controller switching in the mixed schedule.

275 Qualitatively the increase of visuomotor response intensities with time-to-target for our specific  
276 results could be well described by a line function for each of the four combinations of condition  
277 and schedule. In order to get a quantitative estimate of the differences between the conditions  
278 we performed a Two-way ANCOVA analysis of visuomotor response intensity, with schedule and  
279 condition as the two factors, and time-to-target as the covariate. The results showed a significant  
280 main effect of condition (hit or stop,  $F_{1,275} = 24.8$ ,  $p \ll 0.001$ ;  $BF_{incl} = 9.46 \times 10^3$ ), and time-to-  
281 target ( $F_{1,275} = 222.8$ ,  $p \ll 0.001$ ;  $BF_{incl} = 1.04 \times 10^{33}$ ), but no effect of the experimental schedule  
282 (blocked or mixed,  $F_{1,275} = 0.098$ ,  $p = 0.75$ ;  $BF_{incl} = 0.138$ ) or of schedule/condition interaction  
283 ( $F_{1,275} = 1.06$ ,  $p = 0.30$ ;  $BF_{incl} = 0.304$  shows tendency towards no effect). Such results indicate  
284 that we can successfully separate the two different controllers when expressing their feedback  
285 response intensities (or their gains) against the time-to-target. Furthermore, we also show that  
286 such differences are only present when comparing the controllers for different tasks, and are not  
287 dependent on the presentation schedule of these tasks. Thus, we demonstrate that our participants  
288 successfully selected an appropriate controller for a hit or a stop task, even in a schedule where the  
289 task could change on consecutive trials.

## 290 Discussion

291 In this study we have demonstrated that humans are capable of rapid switching between appropri-  
292 ate feedback controllers in the presence of different contextual cues. Specifically, our participants  
293 show systematic differences in feedback responses when performing hitting movements, compared  
294 to reach-and-stop movements. Moreover, the same systematic differences are present, both when  
295 the two tasks are performed in isolation (blocked schedule), or when rapidly switching from one  
296 task to the other (mixed schedule), showing that these differences are evoked within a single trial,  
297 and not gradually adapted. Finally, these feedback responses are also well matched with the  
298 optimal feedback control predictions for these responses in hit and stop tasks, further reinforcing  
299 accumulating evidence of optimality principals in the feedback control of human movements.

300 In order to gain insight into computational mechanisms that are employed when humans switch  
301 between hit and stop conditions, in this study we formulate our hypothesis through normative  
302 modelling (*Harris and Wolpert (1998)*; *Todorov and Jordan (2002)*; *Liu and Todorov (2007)*; *Verstynen and Sabes (2011)*; *Rigoux and Guigon (2012)*; *Berniker and Penny (2019)*). Such an approach  
303 compares the behavioural experimental data to the results simulated computationally through a  
304

305 known bottom-up design. In turn, any mismatch between the data and the model rules out the  
306 mechanism, while matching behaviour provides support for the likelihood of such a mechanism.  
307 Specifically, here we simulate three different types of control movements: stop movement, where  
308 a point mass is stopped at a target 25 cm away from the start position; hit movement, where the  
309 point mass is instead brought to the same target with nonzero terminal velocity; and a long-stop  
310 movement, with similar kinematics to the hit movement within the 25 cm segment, generated by  
311 a stop movement to a secondary virtual target at 28 cm distance. The hit and stop simulations  
312 differed in the implementation of the feedback controller, with the state dependent costs for the  
313 terminal velocity and terminal acceleration reduced by a factor of 50 for the hit condition. As a  
314 result, the two models inherently simulate the behaviour that is achieved via different controllers.  
315 On the other hand, the long-stop condition was simulated by using the same controller as the  
316 stop condition, but to a target at 28 cm instead of 25 cm. Consequently, such a movement still  
317 maintained a non-zero velocity at 25 cm, virtually simulating a hit-like movement. Notably, in order  
318 to better match the kinematics of a long-stop movement to the kinematics of the hit and stop  
319 movements, we temporally modulated the activation cost  $R$  of the long-stop controller, which we  
320 have previously shown does not affect the overall feedback responses in terms of time-to-target  
321 (Česonis and Franklin (2020)). In general, while kinematics of hit and long-stop models matched  
322 well, the two simulations predicted very different feedback response profiles when expressed both  
323 against time-to-target and against position. Finally, the responses of our participants in the hit  
324 condition matched better with the model simulation of the hit condition, rather than the simulation  
325 of the long-stop, providing evidence that humans use different feedback controllers for different  
326 tasks.

327 Principles of contextual switching have been extensively studied in the context of feedforward  
328 adaptation (Wada et al. (2003); Lee and Schweighofer (2009); Howard et al. (2013); Sarwary et al.  
329 (2015); Howard et al. (2017); Forano and Franklin (2020); Forano et al. (2021)). While these cues vary  
330 in effectiveness (Wada et al. (2003); Howard et al. (2013)) and are typically considered as relative  
331 weightings of multiple feedforward models (Wolpert and Kawato (1998)), strong dynamic cues such  
332 as differences in follow-through (Howard et al. (2015); Sheahan et al. (2016)), lead-in (Howard et al.  
333 (2012, 2017)), or visual workspace (Forano and Franklin (2020); Hirashima and Nozaki (2012)) can  
334 effectively separate the feedforward models. As multiple recent papers have demonstrated that  
335 voluntary (feedforward) and feedback control likely share neural circuits (Ahmadi-Pajouh et al.  
336 (2012); Hayashi et al. (2016); Maeda et al. (2018, 2020); Voudouris and Fiehler (2021); Poscente  
337 et al. (2021)), it is reasonable to believe that similar contextual regulation would also be present in  
338 feedback control. However, studies that have shown this parallel changes in the feedback responses  
339 to the learning of the feedforward dynamics, either examined before and after adaptation to  
340 novel dynamics (Wagner and Smith (2008); Ahmadi-Pajouh et al. (2012); Maeda et al. (2018, 2021)),  
341 or during the process of adaptation (Cluff and Scott (2013); Franklin et al. (2017); Franklin and  
342 Franklin (2021); Coltman and Gribble (2020)), meaning that they could not distinguish between  
343 the slow adaptation of the feedback controller to each condition or the rapid switching between two  
344 controllers. Moreover, other studies have suggested that feedforward and feedback controllers are  
345 learned separately and may even compete with one another (Kasuga et al. (2015)), suggesting that  
346 these share different neural circuits and may have different properties. In this study we showed  
347 that in the mixed schedule, where the task goal unpredictably switched between hit or stop tasks on  
348 consecutive trials, participants evoked different control policies for each task. Furthermore, these  
349 policies, evoked within mixed schedule, well matched with the respective policies in the blocked  
350 schedule, suggesting that they were not only different from one another, but also appropriate for  
351 each task, showing the strong separation of the two contexts. While this is not unexpected, as  
352 the two hit and stop tasks are significantly different in their dynamics and thus should act as a  
353 strong contextual cue, one important result is that we demonstrated that the context regulates  
354 the feedback, and not only feedforward control. Finally, our results are also consistent with the  
355 accumulating evidence of the shared relationship between feedforward and feedback control in

356 human reaching.

357 One reason why contextual effects on feedback control have not been broadly studied, is that it is  
358 difficult to quantify what really constitutes a change in feedback control policy. For example, we can  
359 trigger responses of different magnitudes by changing the size of the perturbation (*Franklin et al.*  
360 *(2016)*; *Nashed et al. (2012)*), inducing perturbations at different positions (*Dimitriou et al. (2013)*;  
361 *Česonis and Franklin (2020)*) or at different times (*Liu and Todorov (2007)*; *Oostwoud Wijdenes et al.*  
362 *(2011, 2019)*). However, computationally such differences in response intensity can be achieved  
363 within the same optimal feedback controller without ever changing control parameters. In a recent  
364 study *de Comite et al. (2021)* demonstrated that the control signal is modified during reaching  
365 when the task goal changes. While the study provided important insights into online modification of  
366 control in tasks conceptually similar to the change in context (i.e. obstacles appearing in the path of  
367 reaching), the change in the control signal alone does not directly imply the change in the feedback  
368 controller. That is, from the computational point of view, the control signal  $u$  is modulated not only  
369 by the control gain  $L$ , but also the observed state vector  $\hat{x}$ , which conventionally also includes the  
370 target representation. Thus, it is equally possible that the change in the control signal is achieved  
371 through an update of the target state representation, as it is through the recomputation of the  
372 control policies. Even though the results, described in the article, are indeed likely to be achieved  
373 through the update of the controller gains and not only through the update of the target, they also  
374 highlight the need of more direct methods to evaluate the change in the control. In our study we  
375 separate the two variables (controller gain  $L$  and state estimate  $\hat{x}$ ) through normative modelling,  
376 where we make predictions on the human behaviour. Specifically, we simulate the behaviour either  
377 by recomputing the controller  $L$  (Figure 3BC, hit and stop), or by updating the state estimate  $\hat{x}$  and  
378 using the same controller  $L$  (Figure 3BC, stop and long-stop), to compare with the experimental  
379 results (Figure 3EF). These results show that humans indeed change their control policies when  
380 the task goal (e.g. hit or stop) changes. Thus, by combining behavioural results with normative  
381 control models we can clearly identify that it is specifically the change in control, and not other  
382 mechanisms, that is responsible for the regulation observed in the experimental data.

383 Previous studies have demonstrated that visuomotor feedback intensity profiles are roughly  
384 bell-shaped along the movement – low at the beginning and the end, and peaking in the middle  
385 (*Dimitriou et al. (2013)*; *Česonis and Franklin (2020)*) – leading to assumptions that these gains  
386 might parallel the velocity (*Voudouris and Fiehler (2021)*; *Poscente et al. (2021)*). Our simulations  
387 and experimental results (Figure 3CF) demonstrate that this bell-shape profile is not fixed, and that  
388 other profiles are possible. In our previous work, we established a robust relationship between  
389 the visuomotor feedback intensities and time-to-target, demonstrating that time-to-target is the  
390 fundamental variable that modulates the responses, given that the task goal (and thus the feedback  
391 controller) remains the same (*Česonis and Franklin (2020)*). This means that the bell-shaped profile  
392 is simply a by-product of a specific timing of perturbations, and is not regulated by their onset  
393 location. As a consequence, the shape of these feedback intensity profiles can be modulated  
394 away from the bell-shaped profile by changing movement speed, target distance or acceleration  
395 profile. Such results illustrate possible caveats in the experimental paradigms of motor control:  
396 historically, some of the task requirements have been largely consistent, particularly in terms of  
397 reaching distance, reaching speed or duration. This may result in some measured behavioural  
398 outcomes being specific to these kinematics or conditions rather than representing the general  
399 features of the motor control system. Thus, while we do not advocate for routinely altering the  
400 standard experimental and analytical methods, it is worth considering the specific biases that such  
401 methods may contribute to a given study.

402 One popular way of looking at the visuomotor responses in humans is how they vary with  
403 position in a movement. Indeed, numerous studies either analyse the evolution of responses  
404 against position (*Dimitriou et al. (2013)*; *Česonis and Franklin (2020)*; *Poscente et al. (2021)*), or  
405 induce perturbations based on a fixed position (*Franklin and Wolpert (2008)*; *Knill et al. (2011)*;  
406 *Franklin et al. (2016)*; *Gallivan et al. (2016)*; *de Brouwer et al. (2017, 2018)*; *Cross et al. (2019)*), with

407 the expectation that these perturbations induce similar responses unless the control changes. For  
408 example, *Knill et al. (2011)* demonstrated different feedback responses, induced at a matched  
409 position in movements towards different targets. While we believe that these different target  
410 properties indeed suggest different feedback controllers, such a distinction cannot be reliably tested  
411 with only one perturbation, matched by position. Our results clearly demonstrate the limitations of  
412 position as the main variable to probe such control. On one hand, even with similar kinematics  
413 for the majority of the movement, simulations of stop and long-stop movements predict radically  
414 different responses at matching positions (Figure 3C), despite the fact that these are generated  
415 with identical controllers. On the other hand, different controllers for hit and stop conditions  
416 still produced roughly matching feedback responses at the same position, consistent with the  
417 experimental data (Figure 3CF). In contrast to position as the main variable, OFC simulations in  
418 both this study and our previous work (*Česonis and Franklin (2020)*) show that the same controller,  
419 when expressed against time-to-target, produces matching response profiles, independent of  
420 other kinematic factors such as movement velocity or position of the perturbation onset (Figure  
421 3B). Furthermore, different controllers, such as hit and stop, produce feedback responses with  
422 systematic differences when expressed against time-to-target, exactly as demonstrated by our  
423 participants. Thus, we propose that time-to-target is the better reference frame for comparing  
424 feedback responses.

425 In this study we have raised two alternative hypotheses about the regulation of feedback  
426 controllers within the mixed schedule. The first possibility is that the feedback control gradually  
427 adapts to a given task over a few consecutive trials, similar to the feedforward control during  
428 learning of a force field or visuomotor rotation. If such adaptation was true, we expect different  
429 feedback intensities between the hit and stop conditions in the blocked schedule as the controller  
430 has enough trials to reach steady-state behaviour. However, in the mixed schedule the controller  
431 would drift between the equilibrium of hit and stop conditions, producing similar responses for  
432 mixed hit and mixed stop conditions. Note that even in such a case where only a single controller is  
433 performing both hit and stop trials, we would not necessarily expect any effects on the kinematics  
434 or the participant's ability to complete the task. Instead, due to the feedback nature of the control,  
435 a sub-optimal controller would still complete the movement, but produce sub-optimal (e.g. more  
436 costly) responses in the presence of external disturbances. The second possibility is that an  
437 appropriate controller is selected before each movement based on the provided context, allowing  
438 immediate switching between tasks. In this case, the feedback intensity profiles would match for  
439 the same task, regardless of the schedule of their presentation. That is, we expect to see similarities  
440 between both hit conditions, as well as between both stop conditions, but differences between any  
441 two hit and stop conditions. Our experimental results strongly support the latter option, as we  
442 not only observe differences between mixed hit and mixed stop conditions, but also observe their  
443 respective match with the blocked conditions. While our results do not rule out the adaptation of  
444 feedback controllers in general, we do demonstrate that different optimal controllers can be rapidly  
445 selected and switched between for familiar tasks.

446 One important aspect of the relationship between feedforward and feedback control is that  
447 modulating one of them should affect the behaviour of the other. Indeed, previous work has  
448 demonstrated that human participants changed their feedback gains after adapting their feedfor-  
449 ward models to novel dynamics (*Wagner and Smith (2008)*; *Ahmadi-Pajouh et al. (2012)*; *Franklin*  
450 *et al. (2012)*; *Cluff and Scott (2013)*; *Franklin et al. (2017)*; *Maeda et al. (2018)*; *Coltman and Gribble*  
451 *(2020)*; *Maeda et al. (2021)*; *Franklin and Franklin (2021)*). However, an adapted movement in the  
452 force field typically produces kinematics that are similar to those in baseline movements, suggesting  
453 that such change of gains is achieved at matching times-to-target, and with the same task goal.  
454 Thus, our proposed framework that the relation between feedback intensities and time-to-target  
455 is unique for a unique controller would predict that the feedback gains would remain unchanged.  
456 As a result, we can not directly explain this change of control gains, unless the feedback controller  
457 somehow changes during adaptation. One factor driving such a change is that adapted movements

458 in the force field are more effortful than baseline movements, due to additional muscle activity  
459 required to compensate for the force. An increased effort in the context of OFC simulations would  
460 thus increase the model activation cost  $R$ , resulting in a change of optimal feedback gains and  
461 intensities at matching times-to-target. In addition, the presence of a force field likely influences the  
462 biomechanics of the movement (particularly the muscle viscosity  $b$ ), changes the state transition  
463 due to the external dynamics (via state transition matrix  $A$ ), and updates the state uncertainty  
464 (*Izawa et al. (2008)*), resulting in the same controller being applied to a different control plant, and  
465 thus producing different responses. Moreover, if the controller is optimised to this new control  
466 plant, adaptation will inevitably require a new feedback controller. Therefore, such changes in  
467 feedback control are expected, even though conventionally it appears that the task goal remains  
468 the same after adaptation to the novel dynamics.

469 Even though many recent studies use force channel trials (*Scheidt et al. (2000)*) to accurately  
470 measure the visuomotor feedback responses (*Franklin and Wolpert (2008)*; *Franklin et al. (2012)*),  
471 often these brief perturbation trials are complemented with maintained perturbation trials (*Re-*  
472 *ichenbach et al. (2013, 2014)*; *Reichenbach and Diedrichsen (2015)*; *Franklin et al. (2016, 2017)*;  
473 *de Brouwer et al. (2017, 2018)*; *Česonis and Franklin (2020)*). This is because brief perturbations  
474 within a channel trial are task-irrelevant, and can be ignored without compromising the task,  
475 whereas maintained perturbations strengthen these responses as they require an active correction  
476 for the participant to reach the target. However, we have recently shown that these maintained  
477 perturbations also force a non-trivial extension of the movement duration compared to the non-  
478 perturbed movement, and thus complicate the relationship between the perturbation onset location  
479 and the time-to-target. Hence, in order to consistently evaluate the control behaviour and its re-  
480 lation to the time-to-target, here we deliberately chose to only induce perturbations within the  
481 force channels and not to include the maintained perturbations. Although this generally decreases  
482 overall feedback intensities, our participants produced clear responses that exhibited the temporal  
483 evolution as predicted by the OFC model simulations.

484 In summary, here we again demonstrate that time-to-target (elsewhere referred to as urgency)  
485 (*Česonis and Franklin (2020)*; *Crevecoeur et al. (2013)*; *Poscente et al. (2021)*; *Oostwoud Wijdenes*  
486 *et al. (2011, 2019)*), and not position or velocity, act as a primary predictor for the feedback response  
487 intensity when the task goal is fixed. Moreover, when comparing multiple tasks, the time-to-target  
488 reference frame consistently separates the feedback control policies for these tasks – an outcome  
489 that fails when comparing two different controller gains within the position reference frame. While  
490 position within the movement, and velocity at the time of a perturbation, definitely influence the  
491 controller responses, our results clearly demonstrate that the effect of these variables on overall  
492 control may be somewhat exaggerated in the previous literature. For example, our participants  
493 produced temporal evolution of the responses to visual perturbations that neither paralleled  
494 the velocity, nor showed the typical variation with position (with peak responses achieved mid-  
495 movement), but could be explained by the time-to-target dependency that was predicted by OFC.  
496 In addition, participants were able to switch their feedback controller from one trial to another,  
497 demonstrating the principle of contextual switching for feedback control. Such switching, well  
498 known in feedforward control, further reinforces accumulating evidence of the shared connections  
499 between feedforward and feedback control. Most importantly, our results demonstrate that the  
500 visuomotor feedback control in humans not only follows the principles of optimal control for a  
501 singular task, but also selects an appropriate controller for that task upon presenting the relevant  
502 context.

## 503 **Methods**

### 504 **Participants**

505 Fourteen right-handed (*Oldfield (1971)*) human participants (age 21-29 years, 5 females) with no  
506 known neurological diseases took part in the experiment. All participants were naïve to the purpose



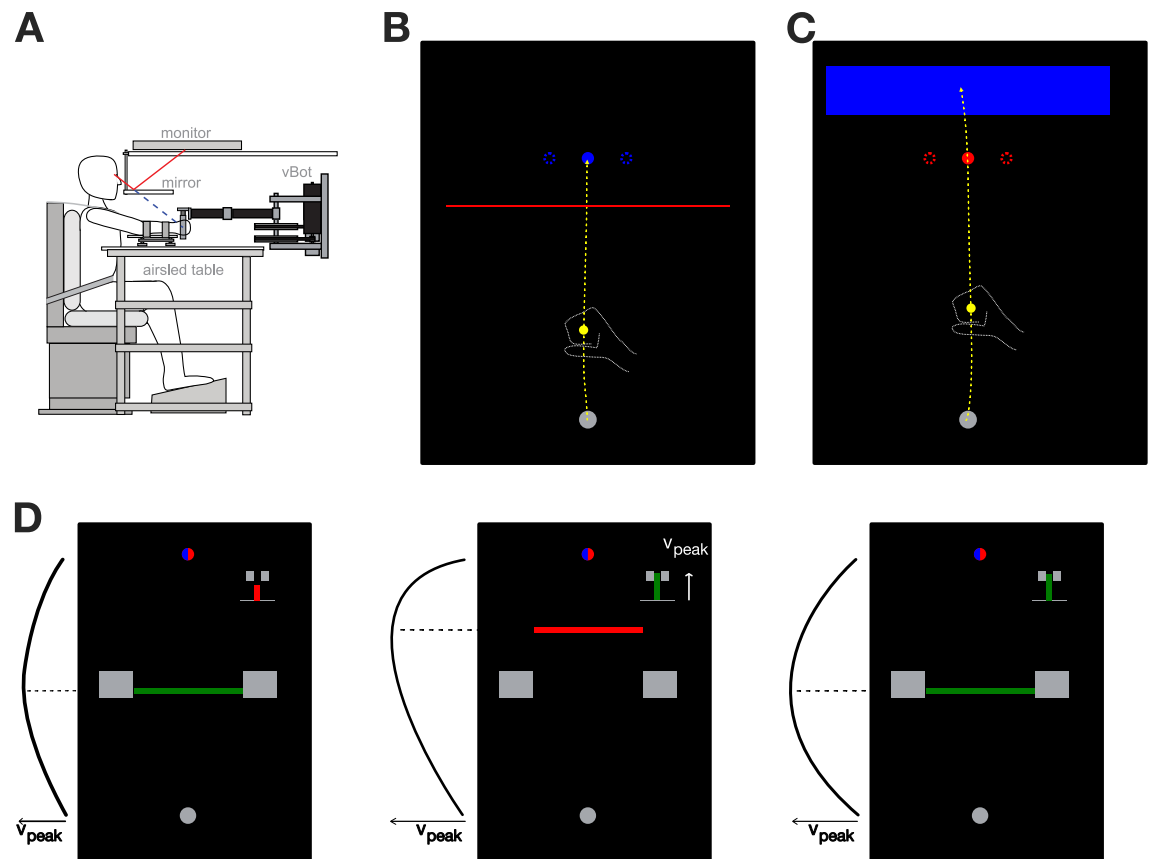

**Figure 5.** Experimental setup. **A.** Participants controlled a yellow cursor by moving a robotic handle. The cursor was projected via a screen-mirror system directly into the plane of the participant's hand. **B.** Stop condition. Participants were instructed to reach with the cursor through a red line and stop within the blue target. Target perturbations were occasionally induced via target jumps of 2 cm laterally. **C.** Hit condition. Participants were instructed to reach through the red target and stop within the blue area. Target perturbations (2 cm laterally) were again induced on random trials. **D.** Visual feedback was presented after each trial. Participants were shown the workspace with the start position and the target still present. In addition, two indicators were displayed. A bar chart at the top-right part of the workspace scaled proportionally with the absolute peak velocity, and was green if the velocity was within the required range as indicated by two grey brackets. A horizontal bar indicating the actual forward location where this peak velocity was achieved was displayed between the start and target positions. This bar was green if the peak location matched the experimental requirements, indicated by two large rectangular blocks. If both location and peak amplitude criteria were successfully fulfilled, participants were rewarded with one point. If at least one of the two criteria was not fulfilled, the respective indicator turned red instead of green, and no point was provided. In both hit and stop experiments participants were instructed to move through the red workspace element and stop at the blue, and were rewarded with one point if they both intercepted the target and fulfilled both velocity requirements.

507 of the study, and provided a written informed consent before participating. The study was approved by  
508 by the Ethics Committee of the Medical Faculty of the Technical University of Munich.

### 509 **Experimental setup**

510 Participants performed forward reaching movements either to a target (stop condition) or through  
511 the target (hit condition) while grasping the handle of a robotic manipulandum (vBOT, *Howard et al.*  
512 (2009)) with their right hand, with their right arm supported on an air sled. Participants were seated  
513 in an adjustable chair and restrained using a four-point harness in order to limit the movement of  
514 the shoulder. A six-axis force transducer (ATI Nano 25; ATI Industrial Automation) measured the  
515 end-point forces applied by the participant on the handle. Position and force data were sampled  
516 at 1 kHz, while velocity information was obtained by differentiating the position over time. Visual

517 feedback was provided via a computer monitor and mirror system, such that this system prevented  
518 direct vision of the hand and arm, and the virtual workspace appeared in the horizontal plane  
519 of the hand (Figure 5A). The exact timing of any visual stimulus presented to the participant was  
520 determined from the graphics card refresh signal.

521 Participants controlled a yellow cursor (circle of 1.0 cm diameter) by moving the robotic handle.  
522 The centre position of this cursor in the virtual workspace always matched the physical position  
523 of the handle. Every experimental trial was initiated when the cursor was brought into the start  
524 position (grey circle of 1.6 cm diameter), which was located 20 cm in front of participants' chest and  
525 centred with the body. When the cursor was within this start position, the circle changed from grey  
526 to white and the type of experimental trial was indicated by the presentation of a target. After a  
527 random delay, sampled from an exponential distribution with  $\lambda = 0.7$  and truncated outside 1.0 s -  
528 2.0 s interval, a tone was played to indicate the start of the movement. If participants failed to leave  
529 the start position within 1000 ms after this tone, the procedure of the current trial was aborted and  
530 restarted.

531 Over the course of the experiment the participants were tasked to complete two types of  
532 movements: stop movements, where they were required to stop within the target (a circle of 1.2  
533 cm diameter, located 25.0 cm in front of the start position) (Figure 5B), or hit movements, where  
534 they had to intercept the target without stopping, and instead stop in a designated stopping area (a  
535 blue rectangle, [width, height] = [15 cm, 4 cm], centred 5 cm beyond the target) (Figure 5C). The  
536 reaching movement was considered complete once the centre of the cursor was maintained for  
537 600 ms either within the area of the target in stop trials, or within the stopping area in the hit  
538 trials. In addition, if the movement duration was longer than 4.0 s, the trial was timed-out and  
539 had to be repeated. After each trial, the participant's hand was passively moved back to the start  
540 position by the vBOT, while the feedback of the previous trial was provided on screen (Figure 5D).  
541 All movements were self-paced, with short breaks provided every 208 trials, and a longer break  
542 (5-10 minutes) provided at the half-way point of the experiment.

### 543 **Experimental paradigm**

544 Participants performed reaching movements in four conditions – blocked stop, blocked hit, mixed  
545 stop and mixed hit – that were part of a single experiment. Across these conditions, participants  
546 were required to either reach to the target and stop there (the stop conditions), or to reach through  
547 the target and stop in the designated stopping area (hit conditions). In order to easily cue the  
548 distinction between the hit and stop conditions, the two types of trials had small visual differences.  
549 For the hit condition participants were presented with a red target (a red circle of 1.2 cm diameter)  
550 and a rectangular blue stopping area of dimensions 15 cm by 4 cm, centred 5 cm beyond the target  
551 (Figure 5C). For the stop condition participants were presented with a target that was otherwise  
552 identical to the target in hit condition, but was blue in colour, and with a horizontal, 15 cm wide  
553 red line, that was placed 3 cm before the target (Figure 5B). While this line had no functional  
554 interaction with the experiment, it allowed us to consistently instruct the participants to always  
555 perform reaching movements so that they intercept the red element in the workspace, and stop  
556 within the blue element.

557 In order to probe the visuomotor feedback responses of participants, during some reaching  
558 movements we briefly perturbed the target by shifting it 2.0 cm laterally for 250 ms before returning  
559 back to the original position (Figure 2A). These perturbed trials were always performed within the  
560 virtual mechanical channel, where participants were free to move along the line between the start  
561 position and the target, but were laterally constrained by a virtual viscoelastic wall with stiffness  
562 of 2 N/m and damping 4000 Ns/m (*Scheidt et al. (2000)*; *Franklin and Wolpert (2008)*; *Dimitriou*  
563 *et al. (2013)*). As the perturbations were always task-irrelevant, this channel therefore did not  
564 obstruct participants to complete the trial. However, as participants still produced involuntary  
565 feedback responses due to the target shift, the virtual channel allowed us to record the forces that  
566 participants produced due to the perturbations and measure the intensities of the visuomotor

567 feedback responses.

568 For each type of movement (i.e. hit or stop) there was a total of 11 different perturbations. Ten  
569 of these perturbations were cued during the reaching movement as participants crossed one of the  
570 five perturbation onset locations, equally spaced between the start position and the target position  
571 (4.2, 8.3, 12.5, 16.7, and 20.8 cm from the centre of the start position). At all of these five locations  
572 the target could either shift to the left or to the right. In addition, one zero-magnitude perturbation  
573 was also included, where the movement was simply performed within the channel without any  
574 target shift in order to probe the force profile of the natural movement. Finally, in addition to  
575 the perturbation trials we also included non-perturbed trials where participants simply reached  
576 towards the target without any target perturbation and without the virtual channel constraining the  
577 hand.

578 In order to present the different perturbations in a balanced manner, we combined different  
579 types of trials in blocks of 16 trials. One block of 16 trials contained 11 perturbed trials (5 per-  
580 turbation onset locations x 2 directions, plus one neutral movement in the force channel), and 5  
581 non-perturbed movements without the force channel. Each of the four experimental conditions  
582 consisted of 26 such blocks, with the order of trials fully randomised within each block, resulting in  
583 416 trials per condition and 1664 trials overall.

584 In the first half of the experiment, participants were always presented with the two blocked-  
585 design conditions (blocked hit and blocked stop), with the order of the conditions balanced across  
586 the population of participants. That is, each participant started with 416 trials of stop trials, followed  
587 by 416 hit trials or vice-versa. In the second half of the experiment, the two final conditions – mixed  
588 hit and mixed stop – were presented in a pseudo-random order within the same blocks. While  
589 individual trials within mixed conditions were identical to the individual trials within the respective  
590 blocked conditions, they were now presented in a pseudo-randomised order. Specifically, the  
591 remaining 832 trials were divided into 26 blocks of 32 trials, with each block consisting of 16 hit and  
592 16 stop trials fully randomised within this block.

### 593 **Feedback regarding movement kinematics**

594 In theory, the movements in hit condition could be interpreted as the movements, where the goal  
595 is to go through the via-point (the red target) and stop at the blue stopping area. As a result, such  
596 movements could simply be treated by participants as the stop movements with longer movement  
597 distance and a less restrictive target. Typically for such reaching movements, humans would  
598 produce a velocity profile that is bell-shaped, with peak velocity near the middle of the movement,  
599 and therefore further along the movement than in the stop condition. In order to avoid such  
600 differences and keep the velocity profiles comparable between the two conditions, we provided  
601 the task-relevant feedback on the velocity profiles, specifically the peak velocity and peak velocity  
602 location, to our participants (Figure 5D).

603 Independent of the experimental condition, participants were required to produce the move-  
604 ments with the peak velocity of  $60 \text{ cm/s} \pm 8 \text{ cm/s}$ , and the peak velocity location within 11.25 cm  
605 - 13.75 cm movement distance (or 45%-55% of the distance between the start location and the  
606 target). The peak velocity was indicated as the small bar chart at the top-right of the screen, with  
607 the required velocity range indicated by two grey brackets. If the velocity target was matched, the  
608 bar chart turned green, otherwise it was red. Similarly, the peak velocity location was shown as a  
609 horizontal bar, centred around the movement distance where the peak velocity was reached. If  
610 this location was within the target range (also indicated by grey brackets), it was displayed as green,  
611 otherwise it was red. Participants were rewarded one point if both velocity requirements were  
612 successfully met, and the cursor intercepted the target during the movement.

### 613 **Data Analysis and Code Availability**

614 All data was pre-processed for the analysis in MATLAB 2017b: force and kinematic time series  
615 were low-pass filtered with a tenth-order zero-phase-lag Butterworth filter with 15 Hz cutoff and

616 resampled at 1 kHz to account for an occasional missed sample during the signal recording. All  
617 subsequent analysis was performed in Python 3.9.4 and JASP v0.14.1 (*JASP Team (2021)*). First,  
618 raw visuomotor feedback intensities were calculated from the force responses, recorded after  
619 the induction of a target perturbation. Specifically, for every perturbation trial we averaged the  
620 lateral force response over a time window of 180 ms - 230 ms after the onset of the perturbation,  
621 and subtracted a neutral force profile over the matching time window. This method and the  
622 particular time window has now been used in numerous studies to calculate the intensity of the  
623 early involuntary visuomotor feedback response (*Franklin and Wolpert (2008)*; *Dimitriou et al.*  
624 *(2013)*; *Franklin et al. (2016)*; *Česonis and Franklin (2020)*; *Cross et al. (2019)*; *de Brouwer et al.*  
625 *(2017, 2018)*). As the direction of the response differed based on the perturbation direction, we  
626 reversed the direction of the intensities of responses to the leftward perturbations and grouped all  
627 intensities by the perturbation onset location. Second, we normalised mean feedback responses  
628 between 0 and 1 for each participant in order to avoid the group effect being biased towards  
629 participants with stronger responses. Finally, in our analysis the start of all movements was defined  
630 as the last time sample where the cursor is still within the area of the start circle, and the end  
631 of the movement was defined as the last time sample before the cursor enters the target circle.  
632 Time-to-target values were extracted from the data for every perturbation trial by subtracting the  
633 perturbation onset time from the movement end time.

634 In this article we provide two types of statistical analysis: the conventional frequentist statistics,  
635 as well as complementary Bayesian analysis that is presented as Bayesian factors (*Raftery and*  
636 *Kass (1995)*), which instead of a simple hypothesis testing provides evidence for or against the null  
637 hypothesis. As a result, among other things, Bayesian analysis allows us to distinguish between  
638 accumulating evidence for the null hypothesis, and simply lacking evidence in either direction due  
639 to low power or small sample size.

640 All the Jupyter notebooks for the data analysis, pre-processed experimental data and statistical  
641 analysis conducted in this article are available at <https://figshare.com/s/ddc74e11dc25d04457ae>.

## 642 Computational modelling

643 In this study we formulated our initial hypothesis about the feedback control mechanisms in  
644 humans by first simulating the behaviour of the optimal feedback controller (OFC). Specifically, we  
645 used a finite-horizon linear-quadratic regulator framework – a relatively simple OFC that assumes  
646 perfect sensory input, as well as no control-dependent noise, while still being able to capture a  
647 significant part of the variance of human reaching movements (*Kuo (1995)*; *Česonis and Franklin*  
648 *(2021)*). In order to model the feedback behaviour of our human participants, we first simulated  
649 virtual movements of a point mass with  $m = 1$  kg, and an intrinsic muscle damping  $b = 0.1$  Ns/m.  
650 This point mass was controlled in two dimensions by two orthogonal force actuators that simulated  
651 muscles, and regulated by a control signal  $u_t$  via a first-order low-pass filter with a time constant  
652  $\tau = 0.06$  s. At time  $t$  within the movement, such system could be described by the state transition  
653 model:

$$x_{t+1} = Ax_t + B(u_t + \xi_t), \quad (1)$$

654 where  $A$  is a state transition matrix,  $B$  is a control matrix, and  $\xi_t$  is additive control noise. For one  
655 spacial dimension  $A$  and  $B$  are defined in discrete time as:

$$A = \begin{bmatrix} 1 & \delta t & 0 \\ 0 & 1 - b\delta t/m & \delta t/m \\ 0 & 0 & 1 - \delta t/\tau \end{bmatrix}$$

656 ,

$$B = \begin{bmatrix} 0 \\ \delta t / \tau \\ 0 \end{bmatrix}$$

657 Finally, to simulate our model in discrete time we used the sampling rate  $\delta t = 0.01$  s

658 State  $x_t$  exists in the Cartesian plane and consists of position  $\mathbf{p}$ , velocity  $\mathbf{v}$  and force  $\mathbf{f}$  (two  
659 dimensions each). The control signal  $u_t$  is produced via the feedback control law:

$$u_t = -Lx_t \quad (2)$$

660 where  $L$  is a matrix of optimal feedback control gains, obtained by optimising the performance  
661 index (also known as the cost function):

$$J = \sum_{t=0}^N x_t^T Q_t x_t + u_t^T R_t u_t = \sum_{t=0}^N \omega_{p,t} (\mathbf{p}_t - \mathbf{p}^*)^2 + \omega_{v,t} \|\mathbf{v}_t\|^2 + \omega_{f,t} \|\mathbf{f}_t\|^2 + \omega_{r,t} \|u_t\|^2. \quad (3)$$

662 Here  $x_t^T Q_t x_t$  and  $u_t^T R_t u_t$  are two components of the total cost, known as state-cost and a control-cost  
663 respectively. In addition,  $\omega_p$ ,  $\omega_v$  and  $\omega_f$  are position, velocity and force state cost parameters,  $\mathbf{p}^*$   
664 is a target position,  $\omega_r$  is the activation cost parameter and  $N$  is the duration of the movement,  
665 here required as a model input. Within the finite-horizon formulation, the cost parameters can be  
666 non-stationary and thus be different for every time-point. However, in our simulations we set  $Q = 0$   
667 for  $t \neq N$ , consistent with (Todorov (2005); Liu and Todorov (2007)).

668 In this study we simulate three different controllers that we call stop, hit and long-stop. While  
669 the stop and long-stop controllers are derived from the identical set of costs state-costs  $Q$ , they are  
670 used for slightly different movements (25 cm and 700 ms for stop, 28 cm and 800 ms for long-stop).  
671 We used  $\omega_p = 1.5$ ,  $\omega_v = 1$  and  $\omega_f = 0.1$  as the values for the state cost parameters in this model, and  
672 the activation cost  $R = 3 \times 10^{-6}$ . Furthermore, in order to better match the forward velocity profiles,  
673 we also introduced a non-stationarity in the activation cost  $R$  of the long stop movement, where the  
674 total integral of the activation cost over the movement is not changed, but this cost develops over  
675 time during the movement. Specifically, at a time  $t$  in the trial, the activation cost for the long-stop  
676 movement was computed by:

$$R_{long-stop}(t) = RC(t), \quad (4)$$

677 where

$$C(t) \propto \exp\left(p \frac{t+q}{r}\right), \quad (5)$$

678 and the mean of  $C(t)$  equals 1 for the duration of the trial, so that  $R_{long-stop}$  produces the same  
679 amount of activation as  $R$  over the duration of the trial. Here  $p = 1$ ,  $q = -1000$  and  $r = 65$  are constants,  
680 fit via trial and error in order to produce the forward velocity profile of long-stop condition that  
681 matches the velocity of stop and hit conditions. We have previously shown that such modulation  
682 only affects the kinematics of the movement, but does not change the feedback responses when  
683 expressed against the time-to-target (Česonis and Franklin (2021)). On the other hand, in order  
684 to incentivise the hit controller to produce faster movements at the target, we reduced the cost  
685 parameters for terminal velocity and terminal force by a factor of 50. As a result, such controller  
686 produced hit-like movements that were aimed directly at a target, positioned at 25 cm distance, over  
687 620 ms, which matched the kinematics of the long-stop controller over this movement segment.

688 Finally, for each controller we simulated feedback response intensity profiles along the move-  
689 ment, which we then used to compare the control policies predicted by each controller. To do  
690 so, we induced lateral target perturbations of 2 cm magnitude during the simulated movement  
691 to the target and recorded the corrective force, produced by each controller as a result of these  
692 perturbations. While in the experimental study we only induced such perturbations at five different



693 onsets due to practical reasons, in our simulations we could perturb the movements at every point  
694 in time and fully map the response intensity profiles over the movement. Thus, for each model we  
695 simulated different movements with perturbations at each movement time-step (i.e. every 10 ms),  
696 with one perturbation only happening once per movement. In addition, to simulate the visuomotor  
697 delay that is present in humans, we delayed the onset of each perturbation by 150 ms, so that  
698 for the perturbation triggered at time  $t$ , the target is shifted at time  $t + 150$  ms. We then averaged  
699 the force, produced by our model over a time interval 10 ms – 60 ms after the target was shifted  
700 (160 ms – 210 ms after the perturbation was triggered), representing the visuomotor response  
701 window of 180 ms – 230 ms in human subjects. Note that we used an earlier window for the model  
702 simulations than for the human subjects as the responses in the simulations ramp up fast due to  
703 muscles simplified to a single low pass filter.

## 704 Acknowledgements

705 We thank Hanna Hoogen, Isabelle Hoxha and Oliver Gerke for contributions to preliminary projects  
706 related to this manuscript. We thank Clara Günter, Jing Zhang, Sae Franklin, and Marion Forano for  
707 their feedback on this manuscript.

## 708 References

- 709 Ahmadi-Pajouh, M. A., Towhidkhal, F., and Shadmehr, R. (2012). Preparing to reach: Selecting an adaptive  
710 long-latency feedback controller. *Journal of Neuroscience*, 32(28):9537–9545.
- 711 Baram, Y. and Miller, A. (2007). Auditory feedback control for improvement of gait in patients with Multiple  
712 Sclerosis. *Journal of the Neurological Sciences*, 254(1-2):90–94.
- 713 Barr, C. C., Schultheis, L. W., and Robinson, D. A. (1976). Voluntary, non-visual control of the human vestibulo-  
714 ocular reflex. *Acta Oto-Laryngologica*, 81(5-6):365–375.
- 715 Berniker, M. and Penny, S. (2019). A normative approach to neuromotor control. *Biological Cybernetics*, 113(1-  
716 2):83–92.
- 717 Bock, O., Schneider, S., and Bloomberg, J. (2001). Conditions for interference versus facilitation during sequential  
718 sensorimotor adaptation. *Experimental Brain Research*, 138(3):359–365.
- 719 Česonis, J. and Franklin, D. W. (2020). Time-to-target simplifies optimal control of visuomotor feedback responses.  
720 *eNeuro*, 7(2):1–17.
- 721 Česonis, J. and Franklin, D. W. (2021). Mixed-horizon optimal feedback control as a model of human movement.  
722 *Neurons, Behavior, Data analysis, and Theory*, pages 1–36.
- 723 Cluff, T. and Scott, S. H. (2013). Rapid Feedback Responses Correlate with Reach Adaptation and Properties of  
724 Novel Upper Limb Loads. *Journal of Neuroscience*, 33(40):15903–15914.
- 725 Coltman, S. K. and Gribble, P. L. (2020). Time course of changes in the long-latency feedback response parallels  
726 the fast process of short-term motor adaptation. *Journal of Neurophysiology*, 124(2):388–399. PMID: 32639925.
- 727 Crevecoeur, F., Kurtzer, I., Bourke, T., and Scott, S. H. (2013). Feedback responses rapidly scale with the urgency  
728 to correct for external perturbations. *Journal of Neurophysiology*, 110(6):1323–1332.
- 729 Cross, K. P., Cluff, T., Takei, T., and Scott, S. H. (2019). Visual Feedback Processing of the Limb Involves Two  
730 Distinct Phases. *Journal of Neuroscience*, 39(34):6751–6765.
- 731 Day, B. L. and Lyon, I. N. (2000). Voluntary modification of automatic arm movements evoked by motion of a  
732 visual target. *Experimental Brain Research*, 130(2):159–168.
- 733 de Brouwer, A. J., Gallivan, J. P., and Flanagan, J. R. (2018). Visuomotor feedback gains are modulated by gaze  
734 position. *Journal of Neurophysiology*, 120(5):2522–2531.
- 735 de Brouwer, A. J., Jarvis, T., Gallivan, J. P., and Flanagan, J. R. (2017). Parallel Specification of Visuomotor Feedback  
736 Gains during Bimanual Reaching to Independent Goals. *Eneuro*, 4(2):ENEURO.0026–17.2017.
- 737 de Comite, A., Crevecoeur, F., and Lefèvre, P. (2021). Online modification of goal-directed control in human  
738 reaching movements. *Journal of neurophysiology*, 125(5):1883–1898.

- 739 Diedrichsen, J. (2007). Optimal Task-Dependent Changes of Bimanual Feedback Control and Adaptation. *Current*  
740 *Biology*, 17(19):1675–1679.
- 741 Dimitriou, M. (2016). Enhanced Muscle Afferent Signals during Motor Learning in Humans. *Current Biology*,  
742 26(8):1062–1068.
- 743 Dimitriou, M., Wolpert, D. M., and Franklin, D. W. (2013). The Temporal Evolution of Feedback Gains Rapidly  
744 Update to Task Demands. *Journal of Neuroscience*, 33(26):10898–10909.
- 745 Forano, M. and Franklin, D. W. (2020). Timescales of motor memory formation in dual-adaptation. *PLoS*  
746 *Computational Biology*, 16(10):1–33.
- 747 Forano, M., Schween, R., Taylor, J. A., Hegele, M., and Franklin, D. W. (2021). Direct and indirect cues can enable  
748 dual adaptation, but through different learning processes. *Journal of Neurophysiology*, 126(5):1490–1506.  
749 PMID: 34550024.
- 750 Franklin, D. W., Reichenbach, A., Franklin, S., and Diedrichsen, J. (2016). Temporal Evolution of Spatial Computa-  
751 tions for Visuomotor Control. *Journal of Neuroscience*, 36(8):2329–2341.
- 752 Franklin, D. W. and Wolpert, D. M. (2008). Specificity of Reflex Adaptation for Task-Relevant Variability. *Journal of*  
753 *Neuroscience*, 28(52):14165–14175.
- 754 Franklin, S. and Franklin, D. W. (2021). Feedback Gains modulate with Motor Memory Uncertainty. *Neurons,*  
755 *Behavior, Data analysis, and Theory*, 5(2):1–28.
- 756 Franklin, S., Wolpert, D. M., and Franklin, D. W. (2012). Visuomotor feedback gains upregulate during the learning  
757 of novel dynamics. *Journal of Neurophysiology*, 108(2):467–478.
- 758 Franklin, S., Wolpert, D. M., and Franklin, D. W. (2017). Rapid visuomotor feedback gains are tuned to the task  
759 dynamics. *Journal of Neurophysiology*, page jn.00748.2016.
- 760 Gallivan, J. P., Logan, L., Wolpert, D. M., and Flanagan, J. R. (2016). Parallel specification of competing sensorimotor  
761 control policies for alternative action options. *Nature Neuroscience*, 19(2):320–326.
- 762 Harris, C. M. and Wolpert, D. M. (1998). Signal-dependent noise determines motor planning. *Nature*, 394:780.
- 763 Hayashi, T., Yokoi, A., Hirashima, M., and Nozaki, D. (2016). Visuomotor Map Determines How Visually Guided  
764 Reaching Movements are Corrected Within and Across Trials. *eNeuro*, 3(3):1–13.
- 765 Hirashima, M. and Nozaki, D. (2012). Distinct motor plans form and retrieve distinct motor memories for  
766 physically identical movements. *Current Biology*, 22(5):432–436.
- 767 Houk, J. C. (1976). An Assessment of Stretch Reflex Function. *Progress in Brain Research*, 44(C):303–314.
- 768 Howard, I. S., Ford, C., Cangelosi, A., and Franklin, D. W. (2017). Active lead-in variability affects motor memory  
769 formation and slows motor learning. *Scientific Reports*, 7(1):1–12.
- 770 Howard, I. S., Ingram, J. N., Franklin, D. W., and Wolpert, D. M. (2012). Gone in 0.6 seconds: The encoding of  
771 motor memories depends on recent sensorimotor states. *Journal of Neuroscience*, 32(37):12756–12768.
- 772 Howard, I. S., Ingram, J. N., and Wolpert, D. M. (2009). A modular planar robotic manipulandum with end-point  
773 torque control. *Journal of Neuroscience Methods*, 181(2):199–211.
- 774 Howard, I. S., Wolpert, D. M., and Franklin, D. W. (2013). The effect of contextual cues on the encoding of motor  
775 memories. *Journal of Neurophysiology*, 109(10):2632–2644.
- 776 Howard, I. S., Wolpert, D. M., and Franklin, D. W. (2015). The value of the follow-through derives from motor  
777 learning depending on future actions. *Current Biology*, 25(3):397–401.
- 778 Izawa, J., Rane, T., Donchin, O., and Shadmehr, R. (2008). Motor Adaptation as a Process of Reoptimization.  
779 *Journal of Neuroscience*, 28(11):2883–2891.
- 780 Izawa, J. and Shadmehr, R. (2008). On-Line Processing of Uncertain Information in Visuomotor Control. *Journal*  
781 *of Neuroscience*, 28(44):11360–11368.
- 782 JASP Team (2021). JASP (Version 0.14.1)[Computer software].

- 783 Kasuga, S., Telgen, S., Ushiba, J., Nozaki, D., and Diedrichsen, J. (2015). Learning feedback and feedforward  
784 control in a mirror-reversed visual environment. *Journal of Neurophysiology*, 114(4):2187–2193.
- 785 Knill, D. C., Bondada, A., and Chhabra, M. (2011). Flexible, Task-Dependent Use of Sensory Feedback to Control  
786 Hand Movements. *Journal of Neuroscience*, 31(4):1219–1237.
- 787 Kuo, A. (1995). An optimal control model for analyzing human postural balance. *IEEE Transactions on Biomedical  
788 Engineering*, 42(1):87–101.
- 789 Lee, J.-Y. and Schweighofer, N. (2009). Dual Adaptation Supports a Parallel Architecture of Motor Memory.  
790 *Journal of Neuroscience*, 29(33):10396–10404.
- 791 Liu, D. and Todorov, E. (2007). Evidence for the Flexible Sensorimotor Strategies Predicted by Optimal Feedback  
792 Control. *Journal of Neuroscience*, 27(35):9354–9368.
- 793 Maeda, R. S., Cluff, T., Gribble, P. L., and Pruszynski, J. A. (2018). Feedforward and feedback control share an  
794 internal model of the arm's dynamics. *Journal of Neuroscience*, 38(49):10505–10514.
- 795 Maeda, R. S., Gribble, P. L., and Pruszynski, J. A. (2020). Learning New Feedforward Motor Commands Based on  
796 Feedback Responses. *Current Biology*, 30(10):1941–1948.e3.
- 797 Maeda, R. S., Kersten, R., and Pruszynski, J. A. (2021). Shared internal models for feedforward and feedback  
798 control of arm dynamics in non-human primates. *European Journal of Neuroscience*, 53(5):1605–1620.
- 799 Nashed, J. Y., Crevecoeur, F., and Scott, S. H. (2012). Influence of the behavioral goal and environmental obstacles  
800 on rapid feedback responses. *Journal of Neurophysiology*, 108(4):999–1009.
- 801 Oldfield, R. (1971). The assessment and analysis of handedness: The Edinburgh inventory. *Neuropsychologia*,  
802 9(1):97–113.
- 803 Oostwoud Wijdenes, L., Brenner, E., and Smeets, J. B. (2013). Comparing online adjustments to distance and  
804 direction in fast pointing movements. *Journal of Motor Behavior*, 45(5):395–404.
- 805 Oostwoud Wijdenes, L., Brenner, E., and Smeets, J. B. J. (2011). Fast and fine-tuned corrections when the target  
806 of a hand movement is displaced. *Experimental Brain Research*, 214(3):453–462.
- 807 Oostwoud Wijdenes, L., Van Beers, R. J., and Medendorp, W. P. (2019). Vestibular modulation of visuomotor  
808 feedback gains in reaching. *Journal of Neurophysiology*, 122(3):947–957.
- 809 Oscari, F., Secoli, R., Avanzini, F., Rosati, G., and Reinkensmeyer, D. J. (2012). Substituting auditory for visual  
810 feedback to adapt to altered dynamic and kinematic environments during reaching. *Experimental Brain  
811 Research*, 221(1):33–41.
- 812 Poscente, S. V., Peters, R. M., Cashaback, J. G., and Cluff, T. (2021). Rapid Feedback Responses Parallel the  
813 Urgency of Voluntary Reaching Movements. *Neuroscience*.
- 814 Prablanc, C. and Martin, O. (1992). Automatic control during hand reaching at undetected two-dimensional  
815 target displacements. *Journal of Neurophysiology*, 67(2):455–469.
- 816 Pruszynski, J. A., Gribble, P. L., and Corneil, B. D. (2018). A rapid visuomotor response on the human upper limb  
817 is selectively influenced by implicit motor learning. *Journal of Neurophysiology*, 121(1):85–95.
- 818 Pruszynski, J. A. and Scott, S. H. (2012). Optimal feedback control and the long-latency stretch response.  
819 *Experimental Brain Research*, 218(3):341–359.
- 820 Raftery, A. E. and Kass, R. E. (1995). Bayes Factors. *Journal of the American Statistical Association*, 90(430):773–795.
- 821 Reichenbach, A., Costello, A., Zatska-Haas, P., and Diedrichsen, J. (2013). Mechanisms of responsibility assignment  
822 during redundant reaching movements. *Journal of Neurophysiology*, 109(8):2021–2028.
- 823 Reichenbach, A. and Diedrichsen, J. (2015). Processing reafferent and exafferent visual information for action  
824 and perception. *Journal of Vision*, 15(8):1–12.
- 825 Reichenbach, A., Franklin, D. W., Zatska-Haas, P., and Diedrichsen, J. (2014). A dedicated binding mechanism for  
826 the visual control of movement. *Current Biology*, 24(7):780–785.
- 827 Reynolds, R. F. and Day, B. L. (2012). Direct visuomotor mapping for fast visually-evoked arm movements.  
828 *Neuropsychologia*, 50(14):3169–3173.

- 829 Rigoux, L. and Guigon, E. (2012). A Model of Reward- and Effort-Based Optimal Decision Making and Motor  
830 Control. *PLoS Computational Biology*, 8(10).
- 831 Saijo, N., Murakami, I., Nishida, S., and Gomi, H. (2005). Large-Field Visual Motion Directly Induces an Involuntary  
832 Rapid Manual Following Response. *Journal of Neuroscience*, 25(20):4941–4951.
- 833 Sarwary, A. M. E., Stegeman, D. F., Selen, L. P. J., and Medendorp, W. P. (2015). Generalization and transfer of  
834 contextual cues in motor learning. *Journal of Neurophysiology*, 114(3):1565–1576.
- 835 Saunders, J. A. and Knill, D. C. (2003). Humans use continuous visual feedback from the hand to control fast  
836 reaching movements. *Experimental Brain Research*, 152(3):341–352.
- 837 Saunders, J. A. and Knill, D. C. (2005). Humans use continuous visual feedback from the hand to control both the  
838 direction and distance of pointing movements. *Experimental Brain Research*, 162(4):458–473.
- 839 Scheidt, R. A., Reinkensmeyer, D. J., Conditt, M. A., Rymer, W. Z., and Mussa-Ivaldi, F. A. (2000). Persistence of  
840 motor adaptation during constrained, multi-joint, arm movements. *Journal of neurophysiology*, 84(2):853–862.
- 841 Shadmehr, R., Brashers-Krug, T., and Mussa-Ivaldi, F. A. (1995). Interference in Learning Internal Models of  
842 Inverse Dynamics in Humans. *Advances in Neural Information Processing Systems 7*, 7:1117–1124.
- 843 Sheahan, H. R., Franklin, D. W., and Wolpert, D. M. (2016). Motor Planning, Not Execution, Separates Motor  
844 Memories. *Neuron*, 92(4):773–779.
- 845 Sing, G. C. and Smith, M. A. (2010). Reduction in learning rates associated with anterograde interference results  
846 from interactions between different timescales in motor adaptation. *PLoS Computational Biology*, 6(8).
- 847 Tabak, S. and Collewyn, H. (1994). Human vestibulo-ocular responses to rapid, helmet-driven head movements.  
848 *Experimental Brain Research*, 102(2):367–378.
- 849 Todorov, E. (2005). Stochastic optimal control and estimation methods adapted to the noise characteristics of  
850 the sensorimotor system. *Neural Computation*, 17(5):1084–1108.
- 851 Todorov, E. and Jordan, M. I. (2002). Optimal feedback control as a theory of motor coordination. *Nature*  
852 *Neuroscience*, 5(11):1226–1235.
- 853 Verstynen, T. and Sabes, P. N. (2011). How Each Movement Changes the Next: An Experimental and Theoretical  
854 Study of Fast Adaptive Priors in Reaching. *Journal of Neuroscience*, 31(27):10050–10059.
- 855 Voudouris, D. and Fiehler, K. (2021). Dynamic temporal modulation of somatosensory processing during  
856 reaching. *Scientific Reports*, 11(1):1–12.
- 857 Wada, Y., Kawabata, Y., Kotosaka, S., Yamamoto, K., Kitazawa, S., and Kawato, M. (2003). Acquisition and  
858 contextual switching of multiple internal models for different viscous force fields. *Neuroscience Research*,  
859 46(3):319–331.
- 860 Wagner, M. J. and Smith, M. A. (2008). Shared internal models for feedforward and feedback control. *Journal of*  
861 *Neuroscience*, 28(42):10663–10673.
- 862 Wolpert, D. M. and Kawato, M. (1998). Multiple paired forward and inverse models for motor control. *Neural*  
863 *Networks*, 11(7-8):1317–1329.
- 864 Zhang, Y., Brenner, E., Duysens, J., Verschueren, S., and Smeets, J. B. (2018). Postural responses to target jumps  
865 and background motion in a fast pointing task. *Experimental Brain Research*, 236(6):1573–1581.
